# Supplementary material
Source: MDPI journal article supplement (https://www.mdpi.com/2075-163X/10/2/100)
Supplement: s1 [file s1]

| P<br>GPa | dP | T<br>K | dT  | V<br>Å <sup>3</sup> | dV     |
|----------|----|--------|-----|---------------------|--------|
| 10.7     |    | 0.2    | 298 | 1                   | 21.313 |
| 11.4     |    | 0.2    | 298 | 1                   | 21.229 |
| 12       |    | 0.2    | 298 | 1                   | 21.176 |
| 14.3     |    | 0.2    | 298 | 1                   | 20.96  |
| 16       |    | 0.2    | 298 | 1                   | 20.789 |
| 17.4     |    | 0.2    | 298 | 1                   | 20.659 |
| 18.9     |    | 0.2    | 298 | 1                   | 20.546 |
| 20.5     |    | 0.2    | 298 | 1                   | 20.4   |
| 21.7     |    | 0.2    | 298 | 1                   | 20.291 |
| 22.8     |    | 0.2    | 298 | 1                   | 20.2   |
| 24.3     |    | 0.2    | 298 | 1                   | 20.077 |
| 25.7     |    | 0.2    | 298 | 1                   | 19.948 |
| 28.1     |    | 0.2    | 298 | 1                   | 19.762 |
| 29.4     |    | 0.2    | 298 | 1                   | 19.689 |
| 30.8     |    | 0.2    | 298 | 1                   | 19.583 |
