# Supplementary material
Source: MDPI journal article supplement (https://www.mdpi.com/2075-163X/10/2/100)
Supplement: s1 [file s1]

| P(Gpa)   | dP     | T    | dT | hcp Fe  |        | MgO     |        |       |
|----------|--------|------|----|---------|--------|---------|--------|-------|
|          |        |      |    | V (A^3) | dV     | V (A^3) | dV     |       |
| 41.5691  |        | 300  |    | 1       | 19.053 | 0.002   | 62.625 | 0.005 |
| 47.5541  | 0.1753 | 1759 |    | 47.1    | 19.269 | 0.006   | 63.195 | 0.007 |
| 41.7757  | 0      | 300  |    | 1       | 19.066 | 0.004   | 62.586 | 0.006 |
| 52.4359  | 0      | 2038 |    | 51.97   | 19.175 | 0.004   | 62.591 | 0.009 |
| 52.917   | 0      | 2117 |    | 80.27   | 19.255 | 0.003   | 62.602 | 0.006 |
| 46.2589  | 0      | 300  |    | 1       | 18.881 | 0.001   | 61.748 | 0.004 |
| 52.2887  | 0.1939 | 1818 |    | 45.4    | 19.094 | 0.006   | 62.346 | 0.003 |
| 51.6519  | 0.1978 | 1485 |    | 65.4    | 19.129 | 0.004   | 62.061 | 0.010 |
| 53.3907  | 0.0298 | 1519 |    | 56.8    | 18.989 | 0.002   | 61.786 | 0.007 |
| 55.0794  | 0.0805 | 1632 |    | 167.6   | 18.976 | 0.003   | 61.613 | 0.007 |
| 54.8298  | 0.2095 | 1752 |    | 134.4   | 19.003 | 0.003   | 61.798 | 0.006 |
| 55.4639  | 0.21   | 1922 |    | 99.9    | 18.933 | 0.002   | 61.885 | 0.005 |
| 55.6605  | 0.2459 | 2205 |    | 94.9    | 18.948 | 0.003   | 62.185 | 0.009 |
| 48.3045  | 0      | 300  |    | 1       | 18.761 | 0.003   | 61.386 | 0.007 |
| 59.3007  | 1.7925 | 2503 |    | 117.3   | 19.053 | 0.002   | 61.879 | 0.008 |
| 57.3881  | 0      | 2338 |    | 141.4   | 19.062 | 0.003   | 62.303 | 0.008 |
| 57.2591  | 0      | 2012 |    | 106.2   | 18.917 | 0.006   | 61.665 | 0.007 |
| 60.028   | 0.6153 | 2575 |    | 137.4   | 18.988 | 0.004   | 61.829 | 0.006 |
| 63.3999  | 0.2999 | 3188 |    | 198.4   | 18.991 | 0.003   | 61.950 | 0.008 |
| 65.4429  | 2.6163 | 3399 |    | 220.6   | 18.974 | 0.004   | 61.830 | 0.012 |
| 60.2883  | 0.2243 | 2486 |    | 117.2   | 18.870 | 0.003   | 61.674 | 0.010 |
| 59.3395  | 0.3683 | 2375 |    | 116.1   | 18.840 | 0.002   | 61.714 | 0.012 |
| 55.1595  | 0.2386 | 1892 |    | 115.1   | 18.888 | 0.003   | 61.902 | 0.009 |
| 53.8825  | 0.0623 | 1578 |    | 102.1   | 18.910 | 0.003   | 61.765 | 0.009 |
| 53.9376  | 0.0723 | 1450 |    | 132.2   | 18.875 | 0.004   | 61.605 | 0.009 |
| 53.0883  | 0.054  | 1324 |    | 323     | 18.854 | 0.006   | 61.612 | 0.010 |
|          | 0      |      |    |         |        |         |        |       |
| 75.4026  | 0      | 300  |    | 1       | 17.657 |         | 57.302 | 0.007 |
| 80.9436  | 0.052  | 1441 |    | 63.3    | 17.853 | 0.004   | 57.457 | 0.007 |
| 85.6413  | 0.207  | 2104 |    | 58.2    | 17.739 | 0.007   | 57.414 | 0.006 |
| 86.6887  | 0.3521 | 2347 |    | 89      | 17.752 | 0.009   | 57.483 | 0.006 |
| 87.6737  | 0.1574 | 2496 |    | 103.8   | 17.743 | 0.005   | 57.485 | 0.005 |
| 84.2323  | 0.0971 | 1797 |    | 68.8    | 17.725 | 0.005   | 57.336 | 0.004 |
| 83.6214  | 0.0602 | 1696 |    | 96.2    | 17.713 | 0.006   | 57.326 | 0.004 |
| 81.9017  | 0.0884 | 1448 |    | 134.5   | 17.750 | 0.005   | 57.338 | 0.006 |
| 84.317   | 0.2998 | 1934 |    | 69.9    | 17.760 | 0.005   | 57.438 | 0.005 |
| 84.8394  | 0.0974 | 2013 |    | 70.3    | 17.755 | 0.007   | 57.438 | 0.006 |
| 85.1048  | 0.1054 | 2084 |    | 66.4    | 17.765 | 0.006   | 57.468 | 0.006 |
| 85.3075  | 0.1582 | 2153 |    | 65      | 17.778 | 0.006   | 57.502 | 0.006 |
| 86.5451  | 0.2869 | 2409 |    | 76.8    | 17.797 | 0.005   | 57.558 | 0.007 |
| 86.5346  | 0.2565 | 2468 |    | 78.5    | 17.805 | 0.008   | 57.611 | 0.007 |
| 86.7337  | 0.3335 | 2596 |    | 95.6    | 17.912 | 0.009   | 57.697 | 0.008 |
| 86.4824  | 0.3254 | 2558 |    | 111.2   | 17.843 | 0.009   | 57.696 | 0.006 |
| 87.1354  | 0      | 300  |    | 1       | 17.285 | 0.005   | 55.861 | 0.004 |
| 97.5676  | 0.0965 | 2064 |    | 104.8   | 17.387 | 0.006   | 55.908 | 0.004 |
| 96.4298  | 0.1449 | 1857 |    | 11      | 17.371 | 0.004   | 55.882 | 0.004 |
| 95.7742  | 0.0539 | 1766 |    | 87      | 17.331 | 0.005   | 55.883 | 0.004 |
| 94.7609  | 0.0223 | 1568 |    | 119.2   | 17.328 | 0.004   | 55.854 | 0.004 |
| 100.1116 | 0.1365 | 2345 |    | 66.3    | 17.336 | 0.004   | 55.824 | 0.004 |
| 102.0109 | 0.2791 | 2657 |    | 81.6    | 17.348 | 0.005   | 55.848 | 0.004 |
| 99.3626  | 0.1986 | 2206 |    | 110.7   | 17.356 | 0.004   | 55.806 | 0.004 |

|          |        |      |       |        |       |        |       |
|----------|--------|------|-------|--------|-------|--------|-------|
| 98.7498  | 0.4772 | 2371 | 69.5  | 17.354 | 0.004 | 56.004 | 0.005 |
| 99.632   | 0.1753 | 2555 | 62.2  | 17.361 | 0.004 | 56.047 | 0.004 |
| 99.3403  | 0.1618 | 2426 | 56.3  | 17.367 | 0.003 | 55.981 | 0.005 |
| 102.4882 | 0.4042 | 2746 | 106.7 | 17.403 | 0.005 | 55.858 | 0.004 |
| 103.5536 | 0.2569 | 2889 | 141.6 | 17.356 | 0.004 | 55.848 | 0.004 |
| 104.4787 | 0.2836 | 3028 | 130.2 | 17.361 | 0.005 | 55.843 | 0.004 |
| 104.8809 | 0.3529 | 3054 | 114.2 | 17.328 | 0.004 | 55.821 | 0.004 |
| 105.5185 | 0.3877 | 3227 | 98.9  | 17.396 | 0.006 | 55.877 | 0.004 |
| 120.6177 | 0.1829 | 1640 | 68.8  | 16.682 | 0.004 | 53.188 | 0.004 |
| 120.2584 | 0.1627 | 1564 | 131.6 | 16.657 | 0.004 | 53.178 | 0.005 |
| 122.8694 | 0.3927 | 2044 | 69.8  | 16.671 | 0.004 | 53.229 | 0.005 |
| 121.8227 | 0.3256 | 1865 | 66.1  | 16.640 | 0.003 | 53.214 | 0.005 |
| 120.7461 | 0.0764 | 1702 | 76.3  | 16.645 | 0.003 | 53.213 | 0.005 |
| 114.5921 | 0      | 300  | 1     | 16.553 | 0.002 | 53.006 | 0.004 |
| 125.0864 | 0.4716 | 2272 | 94.1  | 16.626 | 0.003 | 53.160 | 0.004 |
| 126.2971 | 0.5891 | 2590 | 85.5  | 16.625 | 0.003 | 53.250 | 0.004 |
| 127.9736 | 1.4755 | 2976 | 112   | 16.683 | 0.004 | 53.338 | 0.006 |
| 125.2601 | 0.5834 | 2539 | 116.2 | 16.677 | 0.004 | 53.316 | 0.006 |
| 114.8058 | 0      | 300  | 1     | 16.570 | 0.002 | 52.984 | 0.005 |
| 126.0385 | 0.1394 | 1999 | 93.7  | 16.581 | 0.003 | 52.902 | 0.004 |
| 127.5697 | 0.2478 | 2240 | 83.8  | 16.608 | 0.003 | 52.913 | 0.004 |
| 117.8332 | 0      | 300  | 1     | 16.516 | 0.003 | 52.706 | 0.004 |
| 117.7603 | 0      | 300  | 1     | 16.512 | 0.002 | 52.709 | 0.004 |
|          | 0      |      |       |        |       |        |       |
| 79.154   | 0      | 300  | 1     | 17.527 | 0.004 | 56.820 | 0.010 |
| 80.4887  | 0      | 300  | 1     | 17.519 | 0.003 | 56.653 | 0.007 |
| 84.8381  | 0      | 1495 |       | 17.730 | 0.003 | 57.003 | 0.012 |
| 95.4857  | 0.0713 | 1988 | 89.5  | 17.432 | 0.003 | 56.090 | 0.007 |
| 95.9014  | 0.1809 | 2034 | 69.8  | 17.429 | 0.004 | 56.081 | 0.008 |
| 93.6848  | 0.1092 | 1577 | 124   | 17.397 | 0.003 | 55.988 | 0.007 |
| 93.3665  | 0.0676 | 1424 | 104.7 | 17.366 | 0.003 | 55.905 | 0.008 |
| 94.9057  | 0.1259 | 1677 | 111.9 | 17.392 | 0.004 | 55.920 | 0.007 |
| 94.7875  | 0.1264 | 1848 | 95.1  | 17.421 | 0.003 | 56.066 | 0.007 |
| 96.0576  | 0.2538 | 2117 | 83.3  | 17.444 | 0.003 | 56.124 | 0.008 |
| 96.6381  | 0.2025 | 2247 | 101.4 | 17.443 | 0.003 | 56.158 | 0.007 |
| 96.1836  | 0.1946 | 2254 | 80.6  | 17.464 | 0.003 | 56.221 | 0.008 |
| 95.0985  | 0.1615 | 2315 | 73.2  | 17.478 | 0.003 | 56.400 | 0.006 |
| 94.8731  | 0.2915 | 2421 | 65.9  | 17.489 | 0.004 | 56.511 | 0.007 |
| 94.8386  | 0.2306 | 2522 | 72.3  | 17.517 | 0.004 | 56.599 | 0.008 |
| 98.4495  | 0.2989 | 2812 | 141.4 | 17.499 | 0.004 | 56.391 | 0.007 |
| 85.9993  | 0      | 300  | 1     | 17.373 | 0.003 | 55.993 | 0.006 |
|          | 0      |      |       |        |       |        |       |
| 87.9374  | 0      | 300  | 1     | 17.248 | 0.006 | 55.763 | 0.005 |
| 90.7903  | 0      | 300  | 1     | 17.168 | 0.004 | 55.443 | 0.007 |
| 97.0205  | 0.1191 | 1570 | 112.4 | 17.226 | 0.004 | 55.591 | 0.006 |
| 98.0102  | 0.0842 | 1774 | 73.6  | 17.233 | 0.005 | 55.632 | 0.006 |
| 86.6227  | 0      | 1942 | 81.2  | 17.386 | 0.004 | 55.920 | 0.011 |
| 95.3286  | 0.2152 | 2032 | 86.6  | 17.422 | 0.004 | 56.145 | 0.012 |
| 99.258   | 0.2124 | 1937 | 87.5  | 17.290 | 0.005 | 55.615 | 0.006 |
| 96.5763  | 0.3347 | 2187 | 104.5 | 17.436 | 0.004 | 56.120 | 0.005 |
| 88.4561  | 0      | 300  | 1     | 17.226 | 0.004 | 55.708 | 0.003 |
| 99.9082  | 0      | 2486 | 125   | 17.281 | 0.008 | 55.961 | 0.006 |
| 100.1352 | 0      | 2262 | 107   | 17.349 | 0.005 | 55.761 | 0.005 |

|          |        |      |       |        |       |        |       |
|----------|--------|------|-------|--------|-------|--------|-------|
| 99.7464  | 0.2331 | 2238 | 137   | 17.333 | 0.006 | 55.786 | 0.004 |
| 93.7755  | 0      | 300  | 1     | 17.090 | 0.002 | 55.111 | 0.006 |
| 104.714  | 0      | 300  | 1     | 16.846 | 0.002 | 53.958 | 0.009 |
| 106.7789 | 0      | 300  | 1     | 16.820 | 0.002 | 53.757 | 0.007 |
| 113.1566 | 0.228  | 1735 | 69.4  | 16.853 | 0.002 | 53.983 | 0.005 |
| 114.3473 | 0.1589 | 1975 | 102.4 | 16.887 | 0.003 | 54.022 | 0.006 |
| 113.1931 | 0.2061 | 1860 | 85.2  | 16.884 | 0.004 | 54.057 | 0.005 |
| 119.7219 | 0.3383 | 1810 | 81    | 16.696 | 0.003 | 53.381 | 0.005 |
| 111.7739 | 0      | 300  | 1     | 16.641 | 0.003 | 53.266 | 0.004 |
| 122.8021 | 1.0257 | 2326 | 1     | 16.749 | 0.003 | 53.414 | 0.007 |
| 120.9421 | 0.386  | 2273 | 64.8  | 16.774 | 0.002 | 53.562 | 0.004 |
| 121.4083 | 0.6039 | 2445 | 83.8  | 16.790 | 0.004 | 53.627 | 0.006 |
| 121.2404 | 0.8037 | 2430 | 92.8  | 16.780 | 0.003 | 53.632 | 0.006 |
| 112.3329 | 0      | 300  | 1     | 16.619 | 0.002 | 53.218 | 0.004 |
| 125.8461 | 0.1027 | 2386 | 97.8  | 16.668 | 0.003 | 53.161 | 0.004 |
